# Supplementary material for: A New Potent Inhibitor against α-Glucosidase Based on an In Vitro Enzymatic Synthesis Approach
Source: MDPI journal article supplement (doi:10.3390/molecules29040878), 2024-02-16
Supplement: s1 [file s1]

## Supplementary Materials

### **A new potent inhibitors against $\alpha$ -glucosidase based on *in vitro* enzymatic synthesis approach**

Huanyu Zhang <sup>a,b,#</sup>, Xiance Che <sup>c,#</sup>, Hongyan Jing <sup>c</sup>, Yaowu Su <sup>a,b</sup>, Wenqi Yang <sup>a,b</sup>, Rubing Wang <sup>a,b</sup>, Guoqi Zhang <sup>a,b</sup>, Jie Meng <sup>a,b</sup>, Wei Yuan <sup>a,b</sup>, Juan Wang <sup>a,b\*</sup>, Wen yuan Gao <sup>a,b\*</sup>

<sup>a</sup> School of Pharmaceutical Science and Technology, Tianjin University, Tianjin 300072, China;

<sup>b</sup> Key Laboratory of Systems Bioengineering, Ministry of Education, Tianjin University, Tianjin 300072, China;

<sup>c</sup> School of Traditional Chinese Materia Medica, Tianjin University of Traditional Chinese Medicine, Tianjin 301600, China;

Prof. Dr. Wen yuan Gao and Associate Prof. Dr. Juan Wang

School of Pharmaceutical Science and Technology, Tianjin University, Tianjin 300072, P.R. China, Tel: +86 22 87401895; Fax: +86 22 87401895;

Email: pharmgao@tju.edu.cn (Wen yuan Gao, Dr. Gao is fully responsible for the distribution of all materials associated with this article), drwangjuan@tju.edu.cn (Juan Wang)

<sup>#</sup> These authors contributed equally to this work.

|                                                                                                                  |    |
|------------------------------------------------------------------------------------------------------------------|----|
| 1. Supplementary Figures                                                                                         | 3  |
| Figure S1. <sup>1</sup> H NMR spectrum of P3 in methanol- <i>d</i> 4 (600 MHz).                                  | 3  |
| Figure S2. <sup>13</sup> C NMR spectrum of P3 in methanol- <i>d</i> 4 (600 MHz).                                 | 3  |
| Figure S3. HSQC spectrum of P3 in methanol- <i>d</i> 4 (600 MHz).                                                | 4  |
| Figure S4. HMBC spectrum of P3 in methanol- <i>d</i> 4 (600 MHz).                                                | 4  |
| Figure S5. COSY spectrum of P3 in methanol- <i>d</i> 4 (600 MHz).                                                | 5  |
| Figure S6. <sup>1</sup> H NMR spectrum of P4 in methanol- <i>d</i> 4 (600 MHz).                                  | 5  |
| Figure S7. <sup>13</sup> C NMR spectrum of P4 in methanol- <i>d</i> 4 (600 MHz).                                 | 6  |
| Figure S8. HSQC spectrum of P4 in methanol- <i>d</i> 4 (600 MHz).                                                | 6  |
| Figure S9. HMBC spectrum of P4 in methanol- <i>d</i> 4 (600 MHz).                                                | 7  |
| Figure S10. COSY spectrum of P4 in methanol- <i>d</i> 4 (600 MHz).                                               | 7  |
| Figure S11. Wynn diagram of compound targets and II diabetes targets.                                            | 8  |
| Figure S12. Molecular docking of P3 with FGF1.                                                                   | 8  |
| Figure S13. Molecular dynamics simulation of P3 with FGF1.                                                       | 9  |
| Figure S14. SDS-PAGE diagram of mutant M315F.                                                                    | 9  |
| Figure S15. The mutant M315F activity was analyzed by HPLC.                                                      | 10 |
| 2. Supplementary Tables                                                                                          | 10 |
| Table S1. <sup>1</sup> H- and <sup>13</sup> C-NMR (600 MHz) spectral data for product P3 in methanol- <i>d</i> 4 | 10 |
| Table S2. <sup>1</sup> H- and <sup>13</sup> C-NMR (600 MHz) spectral data for product P4 in methanol- <i>d</i> 4 | 11 |
| Table S3. Gene names, degree value, betweenness centrality (BC) and closeness centrality (CC) of key targets     | 12 |
| Table S4. Mutant primers                                                                                         | 13 |

## 1. Supplementary Figures

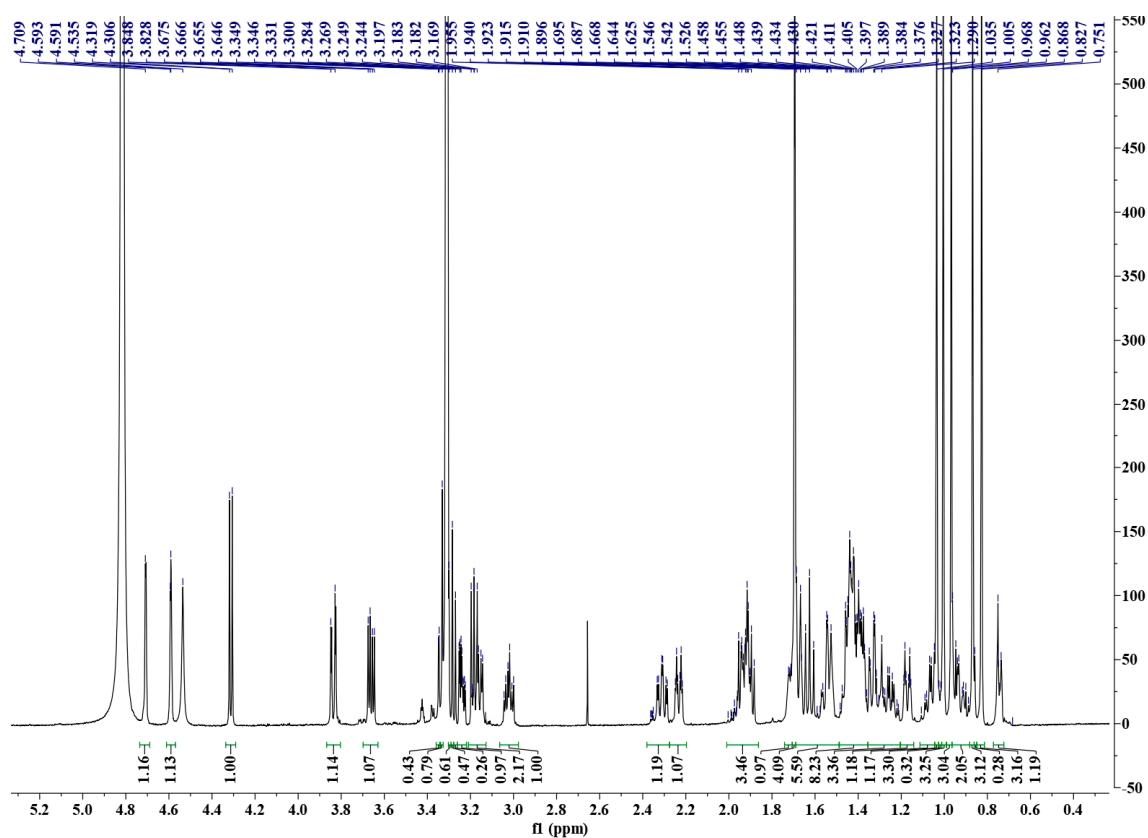

Figure S1. <sup>1</sup>H NMR spectrum of P3 in methanol-*d*<sub>4</sub> (600 MHz).

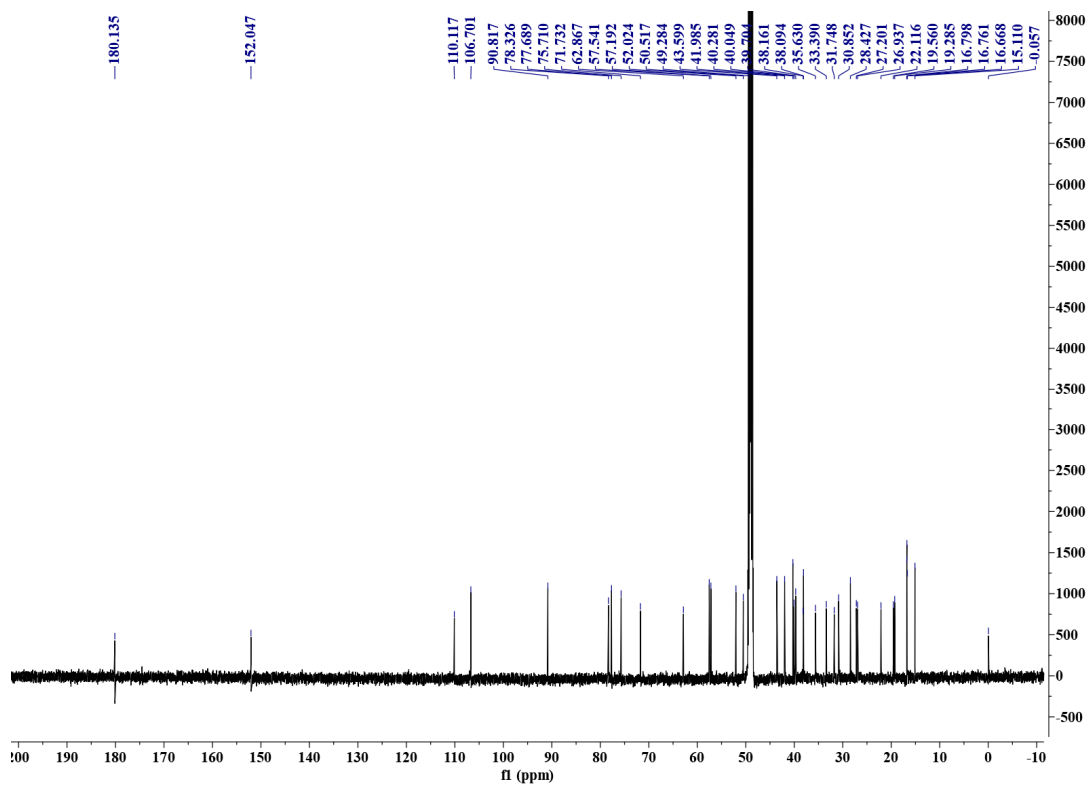

Figure S2. <sup>13</sup>C NMR spectrum of P3 in methanol-*d*<sub>4</sub> (600 MHz).

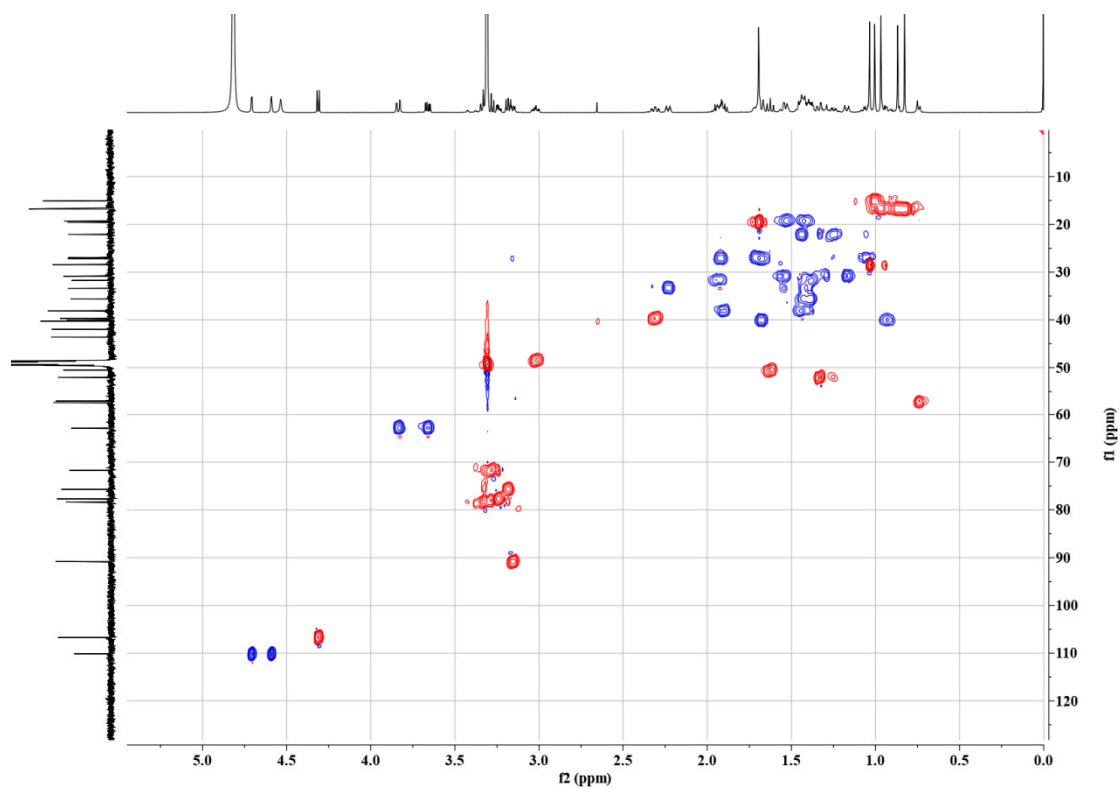

Figure S3. HSQC spectrum of P3 in methanol-*d*4 (600 MHz).

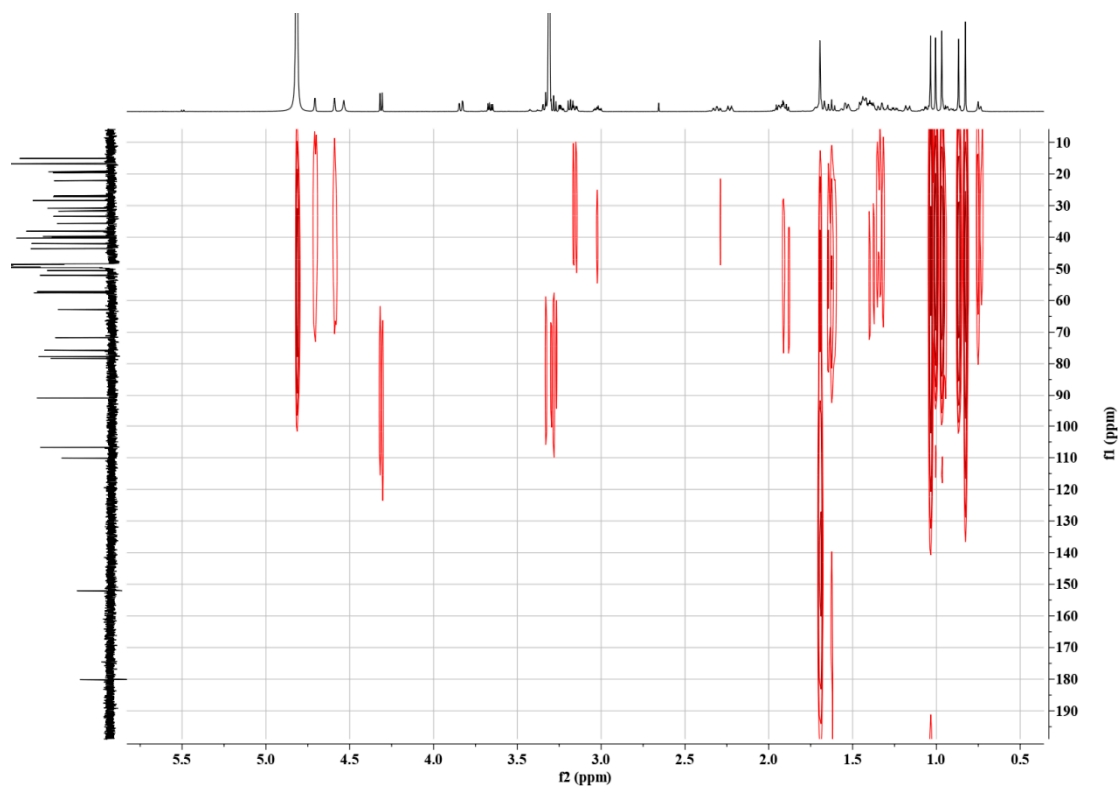

Figure S4. HMBC spectrum of P3 in methanol-*d*4 (600 MHz).

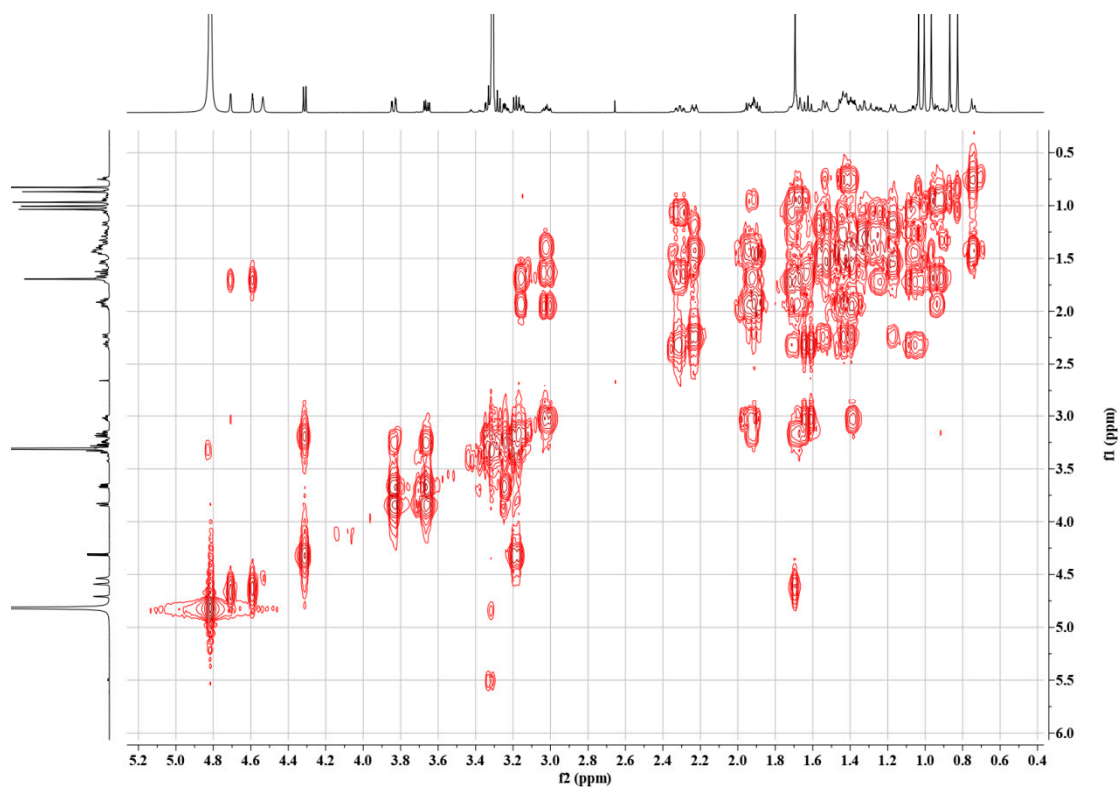

Figure S5. COSY spectrum of P3 in methanol-*d*4 (600 MHz).

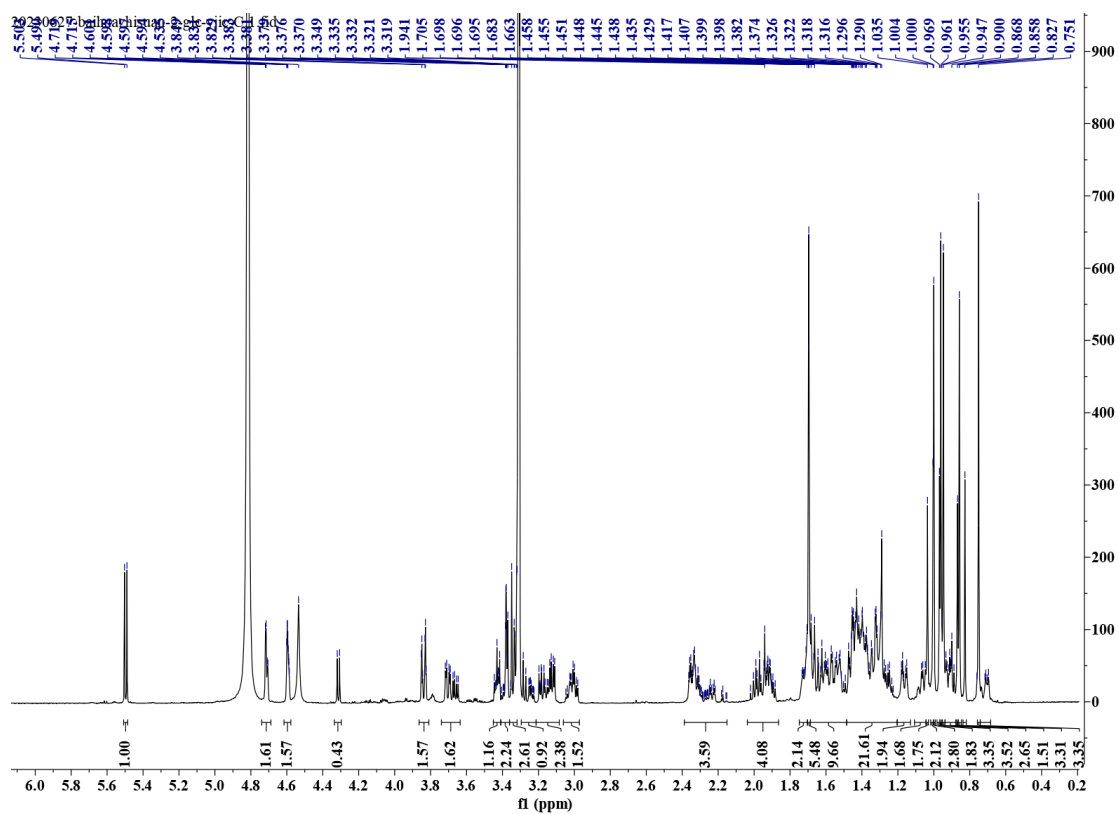

Figure S6.  $^1\text{H}$  NMR spectrum of P4 in methanol-*d*4 (600 MHz).

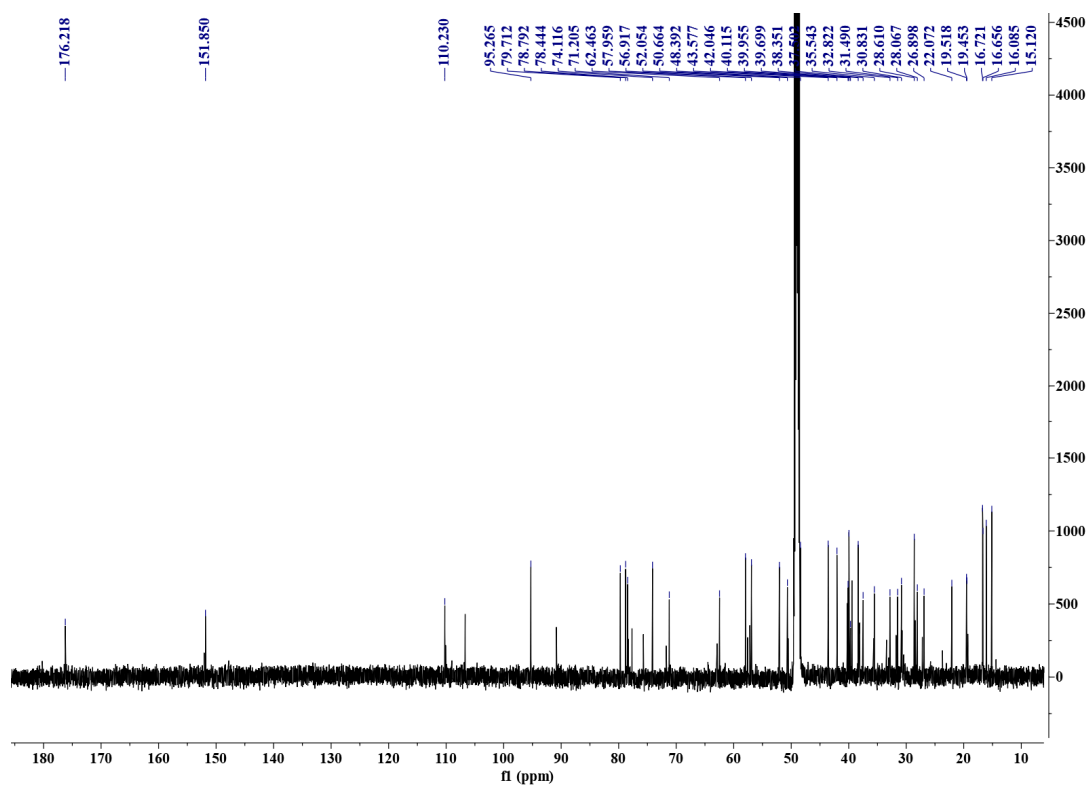

Figure S7.  $^{13}\text{C}$  NMR spectrum of P4 in methanol- $d_4$  (600 MHz).

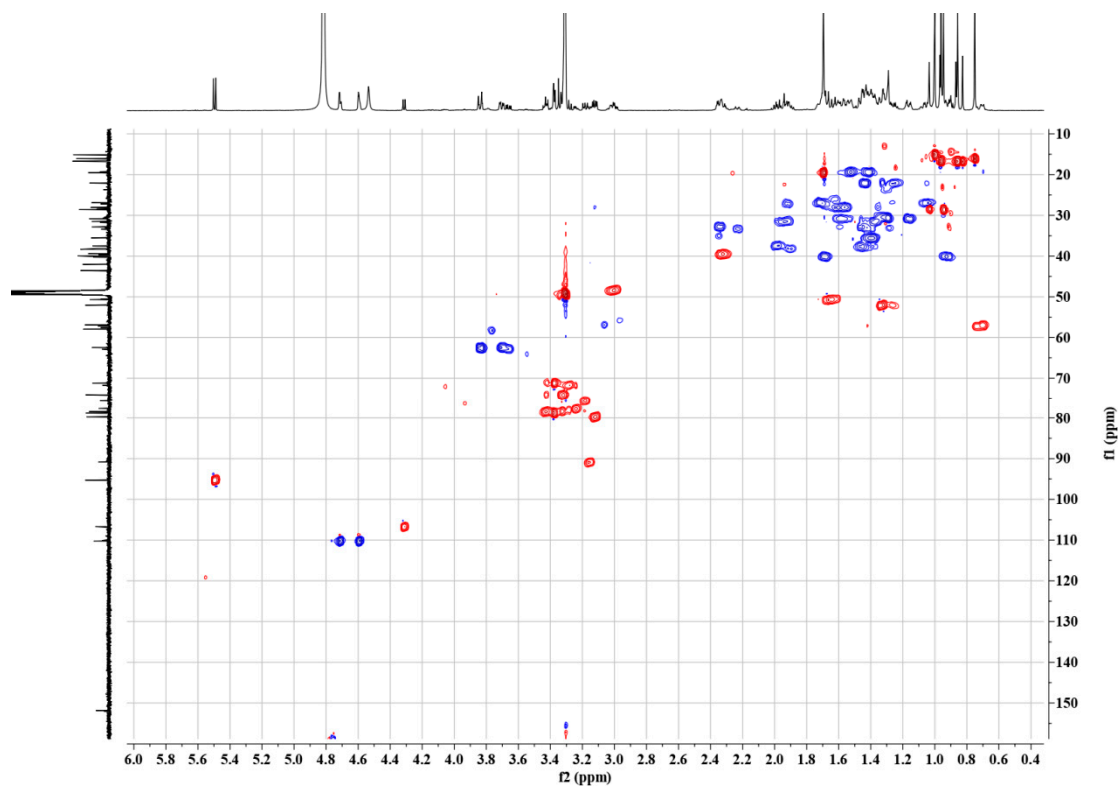

Figure S8. HSQC spectrum of P4 in methanol- $d_4$  (600 MHz).

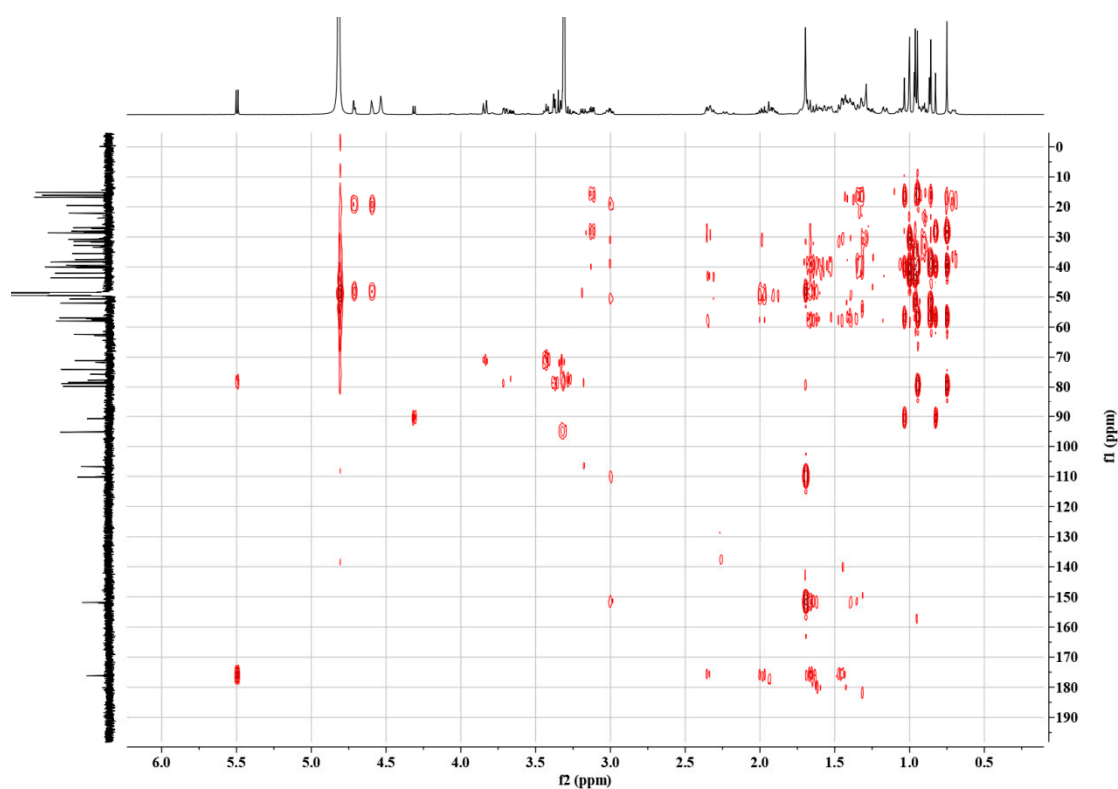

Figure S9. HMBC spectrum of P4 in methanol-*d*4 (600 MHz).

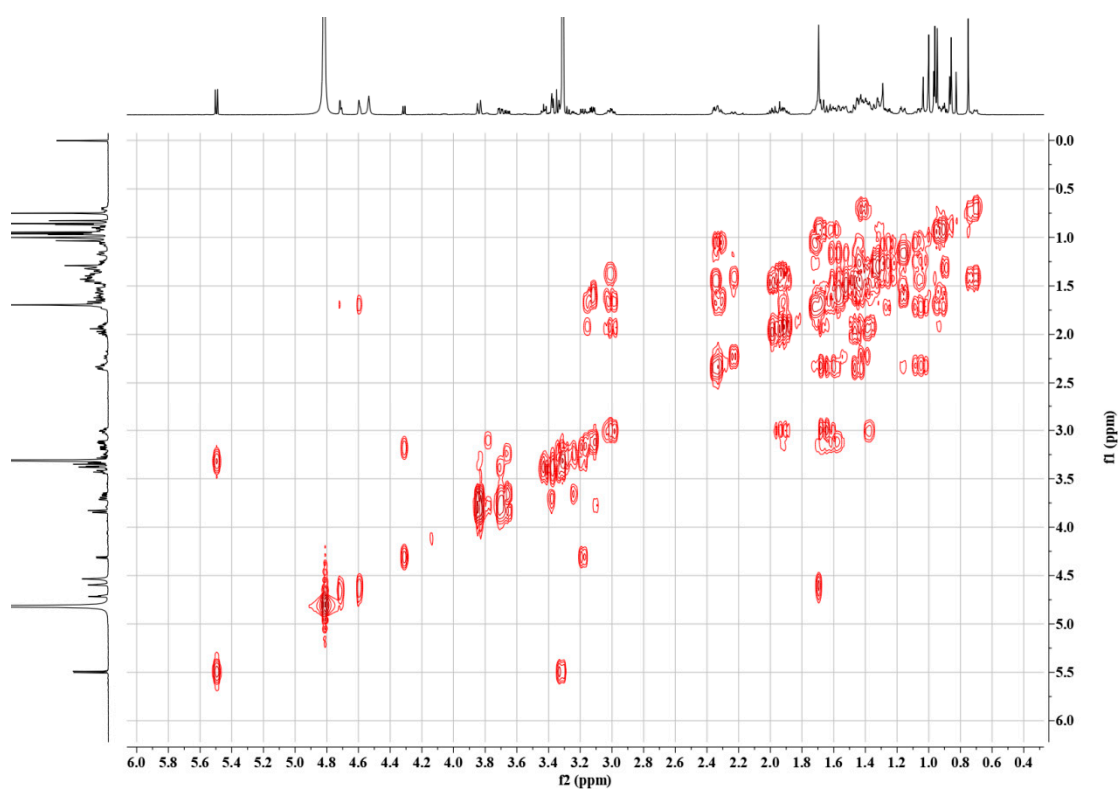

Figure S10. COSY spectrum of P4 in methanol-*d*4 (600 MHz).

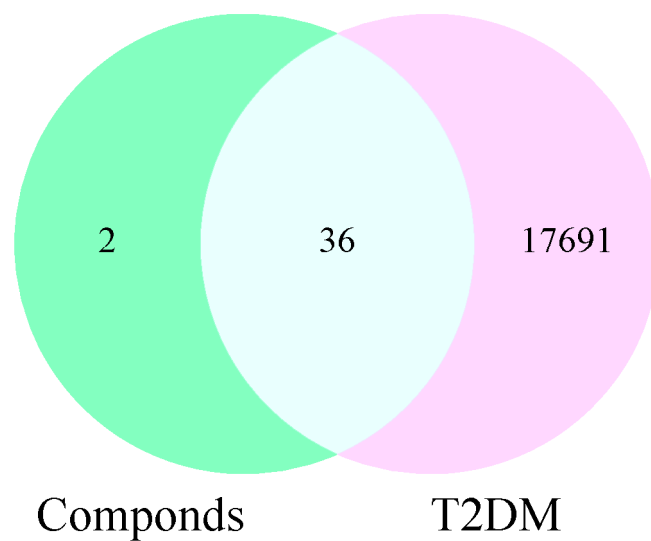

Figure S11. Venn diagram of compound targets and II diabetes targets.

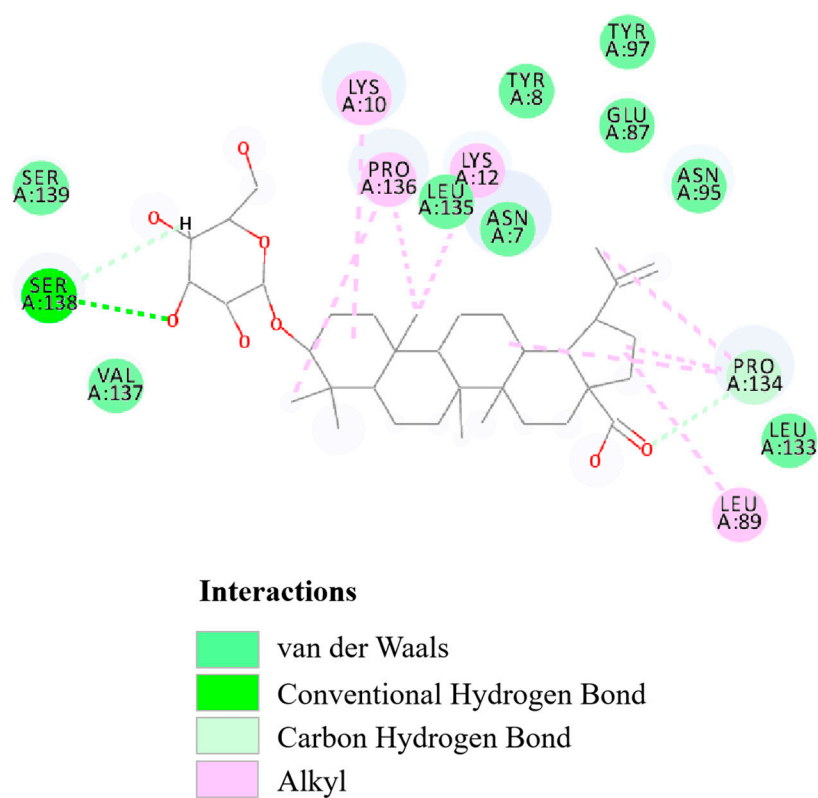

Figure S12. Molecular docking of P3 with FGF1.



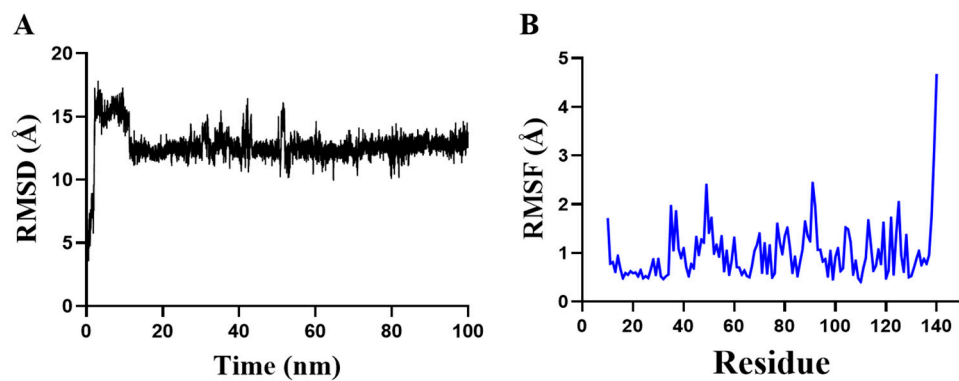

Figure S13. Molecular dynamics simulation of P3 with FGF1.

(A) Time dependence of root mean square deviation (RMSD) of the complex P3/FGF1; (D) Decomposition of binding free energy of residues for FGF1.

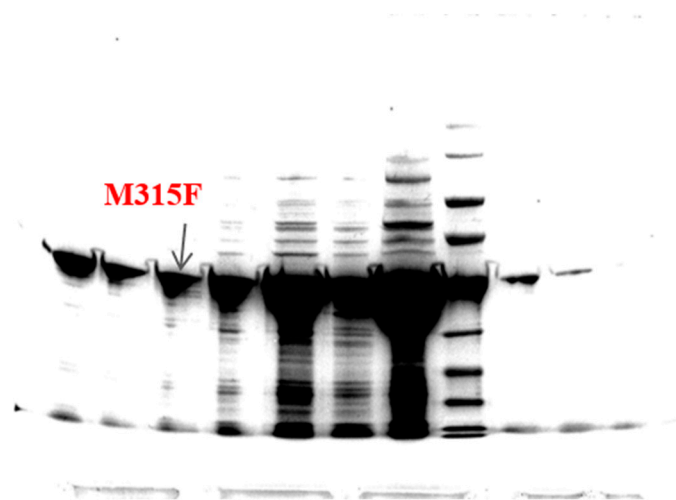

Figure S14. SDS-PAGE diagram of mutant M315F.

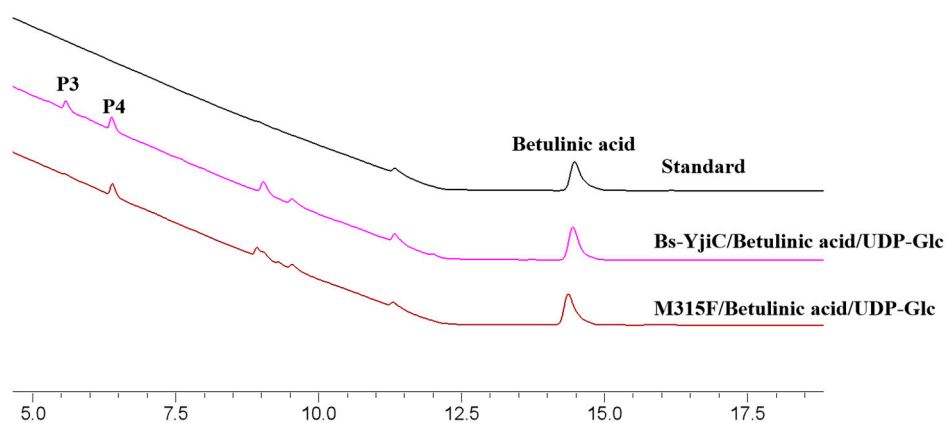

Figure S15. The mutant M315F activity was analyzed by HPLC.

## 2. Supplementary Tables

**Table S1.  $^1\text{H}$ - and  $^{13}\text{C}$ -NMR (600 MHz) spectral data for product P3 in methanol- $d_4$**

| C  | $\delta\text{C}$ (ppm) | $\delta\text{H}$ (ppm)               |
|----|------------------------|--------------------------------------|
| 1  | 40.0                   | CH <sub>2</sub> , 0.93 (m), 1.68 (m) |
| 2  | 27.2                   | CH <sub>2</sub> , 1.68 (m), 1.92 (m) |
| 3  | 90.8                   | CH, 3.15 (m)                         |
| 4  | 40.3                   |                                      |
| 5  | 57.2                   | CH, 0.74 (m)                         |
| 6  | 19.3                   | CH <sub>2</sub> , 1.42 (m), 1.53 (m) |
| 7  | 33.4                   | CH <sub>2</sub> , 1.41 (m), 2.23 (m) |
| 8  | 42.0                   |                                      |
| 9  | 52.0                   | CH, 1.33 (m)                         |
| 10 | 38.2                   |                                      |
| 11 | 22.1                   | CH <sub>2</sub> , 1.25 (m), 1.44 (m) |
| 12 | 26.9                   | CH <sub>2</sub> , 1.04 (m), 1.71 (m) |
| 13 | 39.7                   | CH, 2.31 (m)                         |
| 14 | 43.6                   |                                      |
| 15 | 30.8                   | CH <sub>2</sub> , 1.17 (m), 1.55 (m) |
| 16 | 35.6                   | CH <sub>2</sub> , 1.39 (m), 1.44 (m) |
| 17 | 57.5                   |                                      |
| 18 | 50.5                   | CH, 1.63 (m)                         |
| 19 | 48.5                   | CH, 3.02 (m)                         |
| 20 | 31.7                   | CH <sub>2</sub> , 1.37 (m), 1.91 (m) |
| 21 | 38.1                   | CH <sub>2</sub> , 1.44 (m), 1.91 (m) |
| 22 | 152.1                  |                                      |

|            |       |                                      |
|------------|-------|--------------------------------------|
| 23         | 28.4  | CH <sub>3</sub> , 1.04 (s)           |
| 24         | 16.7  | CH <sub>3</sub> , 0.82 (s)           |
| 25         | 16.8  | CH <sub>3</sub> , 0.97 (s)           |
| 26         | 16.8  | CH <sub>3</sub> , 0.87 (s)           |
| 27         | 15.1  | CH <sub>3</sub> , 1.00 (s)           |
| 28         | 180.1 |                                      |
| 29         | 110.1 | CH, 4.59 (m); CH, 4.71 (m)           |
| 30         | 19.5  | CH <sub>3</sub> , 1.69 (s)           |
| 3-O-Glc-1' | 106.7 | CH, 4.31 ( <i>d</i> , J=7.8 Hz)      |
| 3-O-Glc-2' | 75.7  | CH, 3.19 (m)                         |
| 3-O-Glc-3' | 78.3  | CH, 3.33 (m)                         |
| 3-O-Glc-4' | 71.7  | CH, 3.28 (m)                         |
| 3-O-Glc-5' | 77.7  | CH, 3.24 (m)                         |
| 3-O-Glc-6' | 62.9  | CH <sub>2</sub> , 3.66 (m), 3.83 (m) |

**Table S2. <sup>1</sup>H- and <sup>13</sup>C-NMR (600 MHz) spectral data for product P4 in methanol-*d*<sub>4</sub>**

| C  | δC (ppm) | δH (ppm)                             |
|----|----------|--------------------------------------|
| 1  | 40.0     | CH <sub>2</sub> , 0.92 (m), 1.68 (m) |
| 2  | 28.1     | CH <sub>2</sub> , 1.60 (m), 1.34 (m) |
| 3  | 79.7     | CH, 3.12 (m)                         |
| 4  | 39.7     |                                      |
| 5  | 56.9     | CH, 0.70 (m)                         |
| 6  | 19.5     | CH <sub>2</sub> , 1.41 (m), 1.52 (m) |
| 7  | 35.6     | CH <sub>2</sub> , 1.40 (m), 2.35 (m) |
| 8  | 42.1     |                                      |
| 9  | 52.0     | CH, 1.33 (m)                         |
| 10 | 38.4     |                                      |
| 11 | 22.1     | CH <sub>2</sub> , 1.23 (m), 1.44 (m) |
| 12 | 27.0     | CH <sub>2</sub> , 1.04 (m), 1.70 (m) |
| 13 | 40.1     | CH, 1.68 (m)                         |
| 14 | 43.6     |                                      |
| 15 | 31.5     | CH <sub>2</sub> , 1.37 (m), 1.94 (m) |
| 16 | 32.8     | CH <sub>2</sub> , 1.45 (m), 2.35 (m) |
| 17 | 58.0     |                                      |
| 18 | 50.7     | CH, 1.65 (m)                         |
| 19 | 48.4     | CH, 3.00 (m)                         |
| 20 | 30.8     | CH <sub>2</sub> , 1.12 (m), 1.59 (m) |
| 21 | 37.5     | CH <sub>2</sub> , 1.45 (m), 1.98 (m) |
| 22 | 151.8    |                                      |

|             |       |                               |
|-------------|-------|-------------------------------|
| 23          | 28.6  | CH3, 0.95 (s)                 |
| 24          | 16.1  | CH3, 0.75 (s)                 |
| 25          | 16.7  | CH3, 0.86 (s)                 |
| 26          | 16.7  | CH3, 0.96 (s)                 |
| 27          | 15.2  | CH3, 1.00 (s)                 |
| 28          | 176.9 |                               |
| 29          | 110.2 | CH, 4.60 (m), CH,4.72 (m)     |
| 30          | 19.5  | CH3, 1.70 (s)                 |
| 28-O-Glc-1' | 95.3  | CH, 5.50 ( <i>d</i> , J=6 Hz) |
| 28-O-Glc-2' | 74.1  | CH, 3.32 (m)                  |
| 28-O-Glc-3' | 78.4  | CH, 3.43 (m)                  |
| 28-O-Glc-4' | 71.2  | CH, 3.34 (m)                  |
| 28-O-Glc-5' | 78.8  | CH, 3.38 (m)                  |
| 28-O-Glc-6' | 62.5  | CH2, 3.71 (m), 3.83 (m)       |

**Table S3. Gene names, degree value, betweenness centrality (BC) and closeness centrality (CC) of key targets**

| Gene name | Degree | Closeness centrality | Clustering coefficient |
|-----------|--------|----------------------|------------------------|
| TNF       | 14     | 0.46875000           | 0.34065934             |
| STAT3     | 11     | 0.54545455           | 0.49090909             |
| DRD2      | 11     | 0.56603774           | 0.29090909             |
| IL2       | 10     | 0.42857143           | 0.60000000             |
| FGF2      | 9      | 0.42253521           | 0.75000000             |
| FGF1      | 8      | 0.41666667           | 0.78571429             |
| KDR       | 8      | 0.41666667           | 0.82142857             |
| CYP2D6    | 8      | 0.46875000           | 0.28571429             |
| HSP90AA1  | 7      | 0.41095890           | 0.95238095             |
| HTR2A     | 7      | 0.44117647           | 0.52380952             |
| DRD1      | 7      | 0.40540541           | 0.47619048             |
| ADRA1D    | 7      | 0.41666667           | 0.61904762             |
| HTR2C     | 7      | 0.44117647           | 0.47619048             |
| BCL2L1    | 6      | 0.40540541           | 1.00000000             |
| ADRA2B    | 6      | 0.40000000           | 0.73333333             |
| ADRA2A    | 6      | 0.34883721           | 0.60000000             |
| ADRA1A    | 6      | 0.34883721           | 0.60000000             |
| TLR9      | 5      | 0.40000000           | 1.00000000             |
| HTR1B     | 5      | 0.42857143           | 0.80000000             |
| HTR2B     | 4      | 0.32608696           | 0.50000000             |
| COL18A1   | 4      | 0.33333333           | 1.00000000             |
| ADRA2C    | 4      | 0.38961039           | 0.83333333             |
| RORC      | 3      | 0.38961039           | 1.00000000             |

|         |   |            |            |
|---------|---|------------|------------|
| DRD3    | 3 | 0.40000000 | 0.66666667 |
| HSD11B1 | 3 | 0.45454545 | 0.00000000 |
| CYP27B1 | 3 | 0.45454545 | 0.00000000 |
| ALDH2   | 3 | 0.40000000 | 0.66666667 |
| PTAFR   | 2 | 0.38461538 | 1.00000000 |
| F2      | 2 | 0.32608696 | 1.00000000 |
| HSD11B2 | 2 | 0.32258065 | 0.00000000 |
| GLRA1   | 1 | 0.24793388 | 0.00000000 |

**Table S4. Mutant primers**

| Primers | Sequence (5' to 3')                         |
|---------|---------------------------------------------|
| M315F-F | CGCTGGTGGTGATTCCGCAGTTTTATGAACAAGAACTGACCGC |
| M315F-R | GCGGTCAGTTCTTGTTTCATAAACTGCGGAATCACCACCAGCG |
